# Supplementary material
Source: PubMed Central journal article supplement (PMC9947167)
Supplement: 41467_2023_36350_MOESM1_ESM.pdf [file 41467_2023_36350_MOESM1_ESM.pdf]

# Supplementary Information

|                                                                                                                        |           |
|------------------------------------------------------------------------------------------------------------------------|-----------|
| <b>Supplementary Figures</b> .....                                                                                     | <b>2</b>  |
| Supplementary Figure 1   Surgical procedure of NSTEMI induction in sheep.....                                          | 2         |
| Supplementary Figure 2   Comparison between STEMI and NSTEMI model.....                                                | 4         |
| Supplementary Figure 3   Resemblance of NSTEMI model to clinical cases .....                                           | 6         |
| Supplementary Figure 4   Functional and histological evaluation of the NSTEMI model .....                              | 7         |
| Supplementary Figure 5   Transcriptomics in ischaemic core following NSTEMI .....                                      | 8         |
| Supplementary Figure 6   HIF1 $\alpha$ Causal Network Analysis (IPA <sup>®</sup> ) in ischaemic core post-NSTEMI ..... | 10        |
| Supplementary Figure 7   Functional annotation analysis on transcriptomics.....                                        | 12        |
| Supplementary Figure 8   Glycomics analysis of infarcted hearts following NSTEMI.....                                  | 13        |
| Supplementary Figure 9   HS sulfation pattern following NSTEMI .....                                                   | 16        |
| <b>Abbreviations</b> .....                                                                                             | <b>16</b> |

## Supplementary Figures

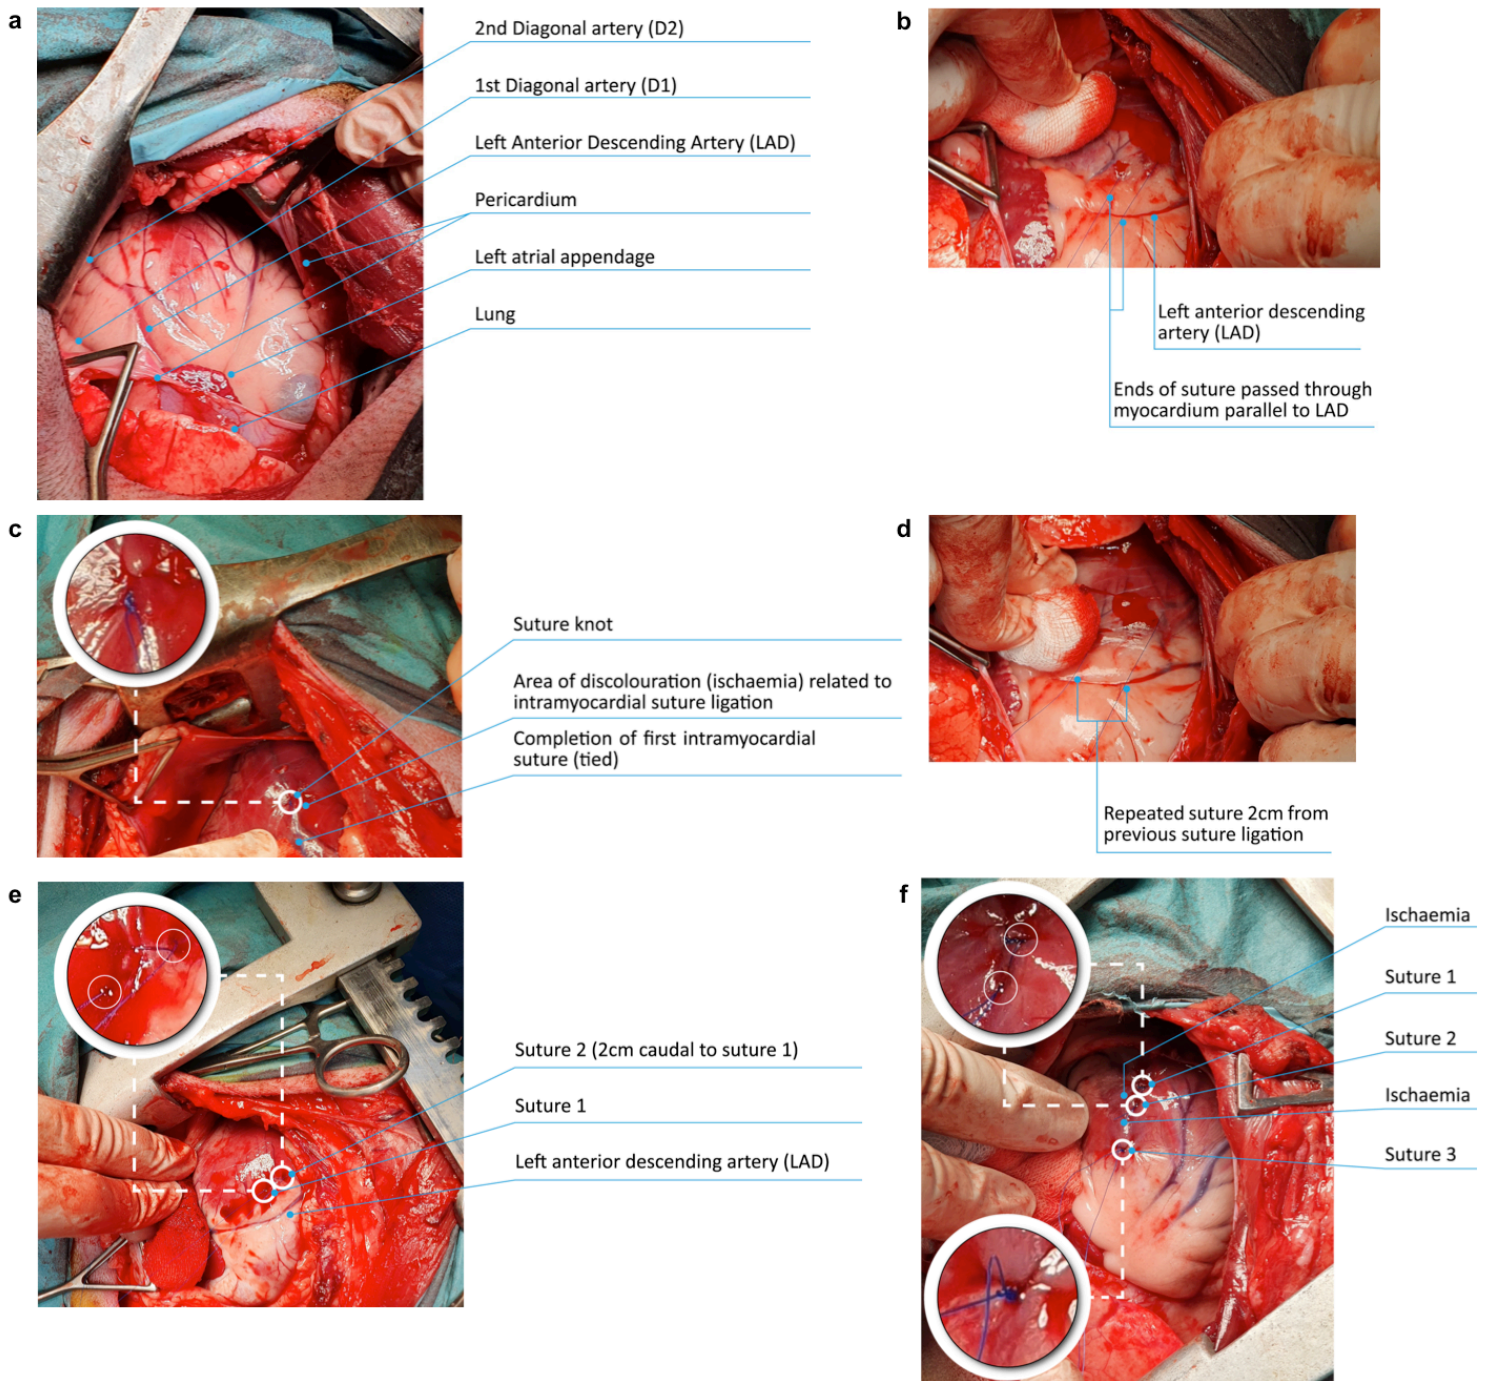

### Supplementary Figure 1 | Surgical procedure of NSTEMI induction in sheep

**a**, Following thoracotomy and pericardiectomy, the heart is exposed to detect LAD and diagonal arteries. **b**, A 2/0 Prolene<sup>®</sup> suture is passed through the left ventricular myocardium parallel to the LAD. **c**, The first suture knot is completed and an initial area of discoloration appears in the proximity of the ligated ventricular portion. **d,e**, A second suture is performed approximately 2 cm apart from the first one, always parallel to LAD. **f**, Progressively, a third suture is performed and tied in the same direction towards the apex of the heart again 2 cm apart from the previous suture. The pale area of ischemia across the suture knots is evident.

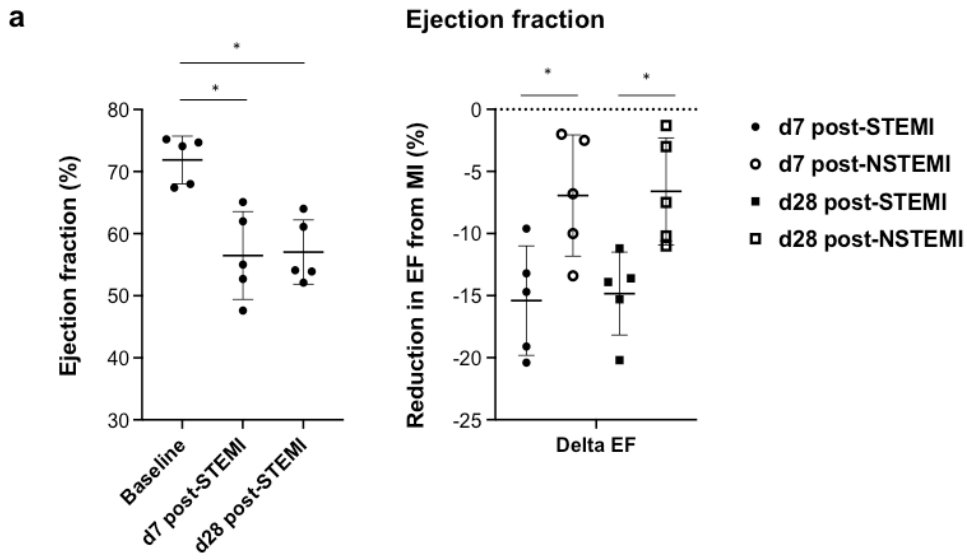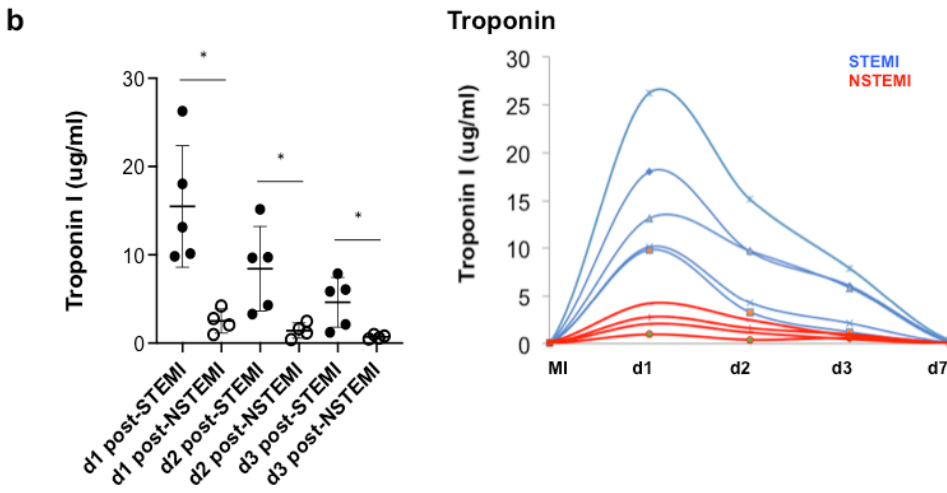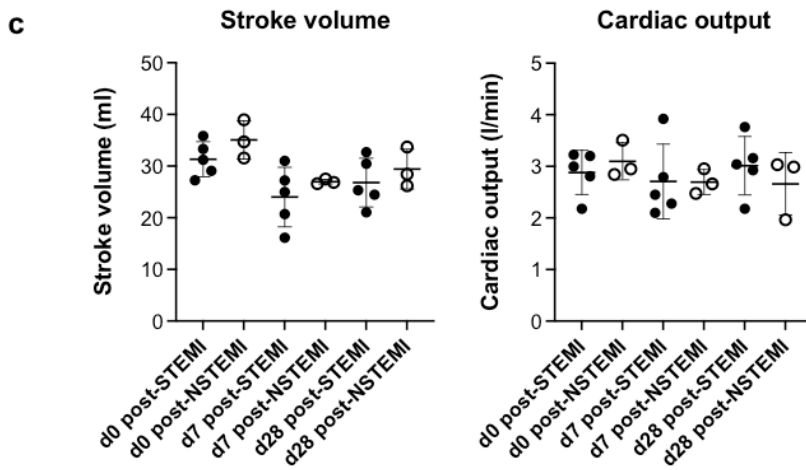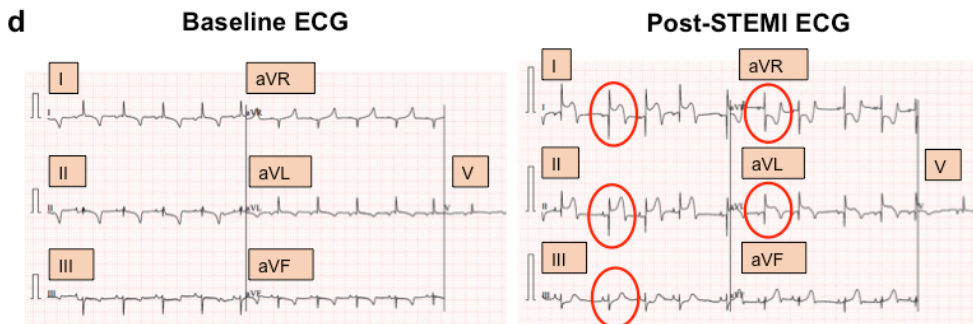

## Supplementary Figure 2 | Comparison between STEMI and NSTEMI model

**a**, Left, ejection fraction (EF) absolute values before ligation (baseline), 7 (d7) and 28 (d28) days after full-occlusion ligation. Right, comparison of the relative decrease in EF on d7 and d28 between STEMI and NSTEMI.  $n=5$  per group. Animals had the same age and weight. **b**, Left, mean troponin I level from d1 to d3 following either STEMI or NSTEMI induction.  $n=5$  STEMI and  $n=4$  NSTEMI animals. Right, individual troponin I level from ligation to d7 post-surgery in STEMI and NSTEMI.  $n=5$  STEMI and  $n=4$  NSTEMI animals. **c**, Haemodynamics of STEMI and NSTEMI in sheep measured as stroke volume (left) and cardiac output (right).  $n=5$  STEMI and  $n=3$  NSTEMI animals. **d**, Representative electrocardiogram (ECG) before STEMI-induction (left) and post-ligation (right). Marked ST elevation in leads I, II and aVL, reciprocal ST depression in lead aVR and milder ST depression in lead III are circled in red.  $n=5$  animals. Kruskal-Wallis with Dunn's multiple comparisons test ( $P=0.018$  for baseline vs. d7 and  $P=0.014$  for baseline vs. d28) in (**a**, left) and (**c**), one-way ANOVA with Tukey's multiple comparisons test ( $P=0.029$  for d7 post-STEMI vs. d7 post-NSTEMI,  $P=0.035$  for d28 post-STEMI vs. d28 post-NSTEMI) in (**a**, right), two-tailed Mann-Whitney test ( $P=0.016$  for d1 post-STEMI vs. d1 post-NSTEMI,  $P=0.016$  for d2 post-STEMI vs. d2 post-NSTEMI,  $P=0.016$  for d3 post-STEMI vs. d3 post-NSTEMI) in (**b**).  $*P<0.05$ . Data are plotted showing the mean and standard deviation in (**a-c**). Source data are provided as a Source Data file.

**a**

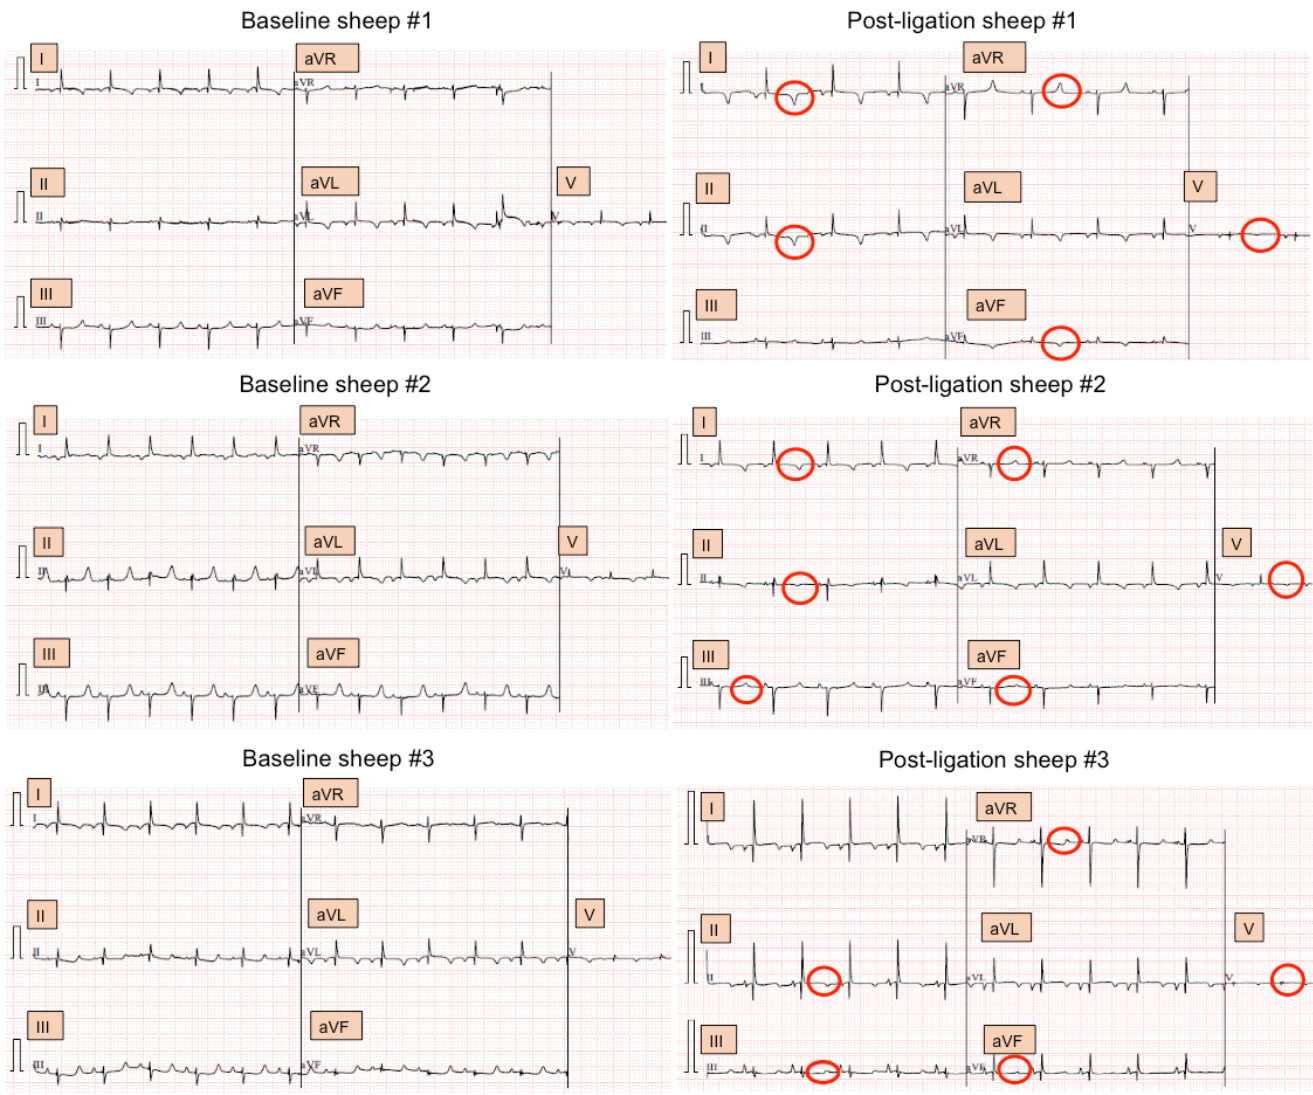

**b**

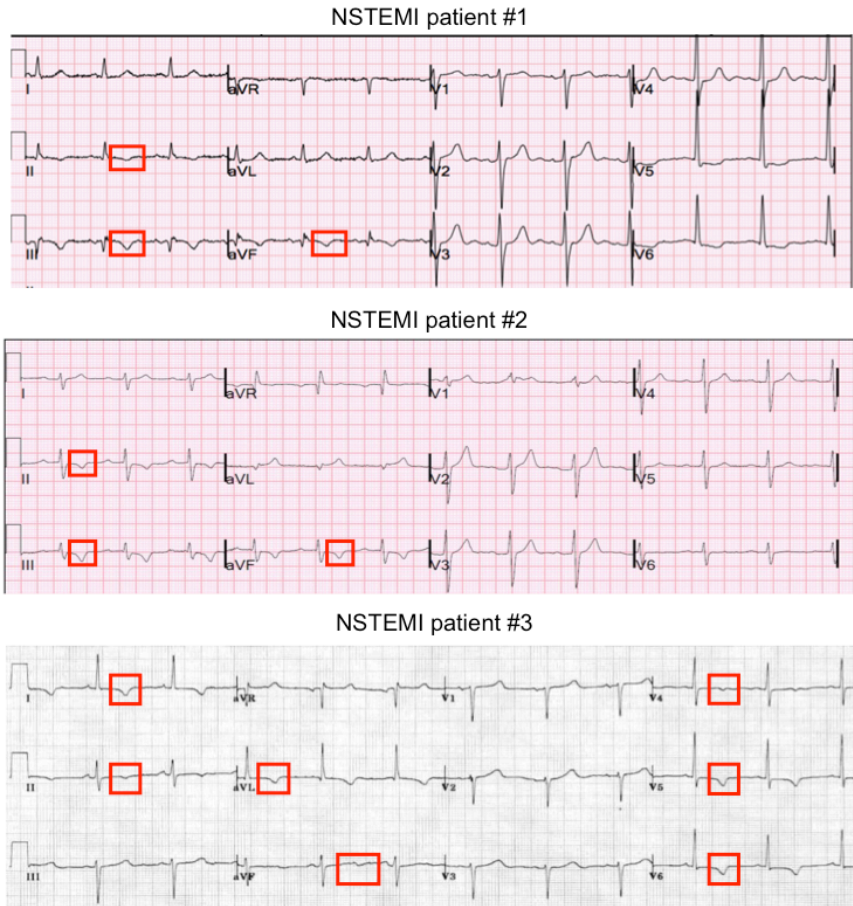

### Supplementary Figure 3 | Resemblance of NSTEMI model to clinical cases

**a**, ECG tracings before and after the induction of an NSTEMI type infarction in sheep. Baseline: ECG tracing with no significant changes in QRS, ST segments or T waves. Post-ligation changes (circled in red) in sheep #1: T wave inversion in leads I, II and aVF, accentuated peaking of T waves in aVR, with flattening of the T wave in leads III and V. Post-ligation changes (circled in red) in sheep #2: T wave inversion in leads I, II and eversion of T wave in aVR, with flattening of the T waves in leads III, aVF and V. Post-ligation changes (circled in red) in sheep #3: T wave inversion in leads II, III and eversion of T wave in aVR, with flattening of the T waves in leads aVF and V. **b**, Clinical ECG tracings in three different patients diagnosed with NSTEMI. Top, patient #1, 59-year-old complaining of persistent angina for two hours: T wave inversion with ST depression (framed in red) in leads II, III and aVF. Middle, patient #2, 67-year-old presenting with prolonged chest pain of sudden onset: T wave inversion with ST depression (framed in red) in the inferior leads II, III and aVF. Bottom, patient #3, 72-year-old with acute onset of prolonged chest pain: Widespread T wave inversion (framed in red) in the septal and inferolateral leads.

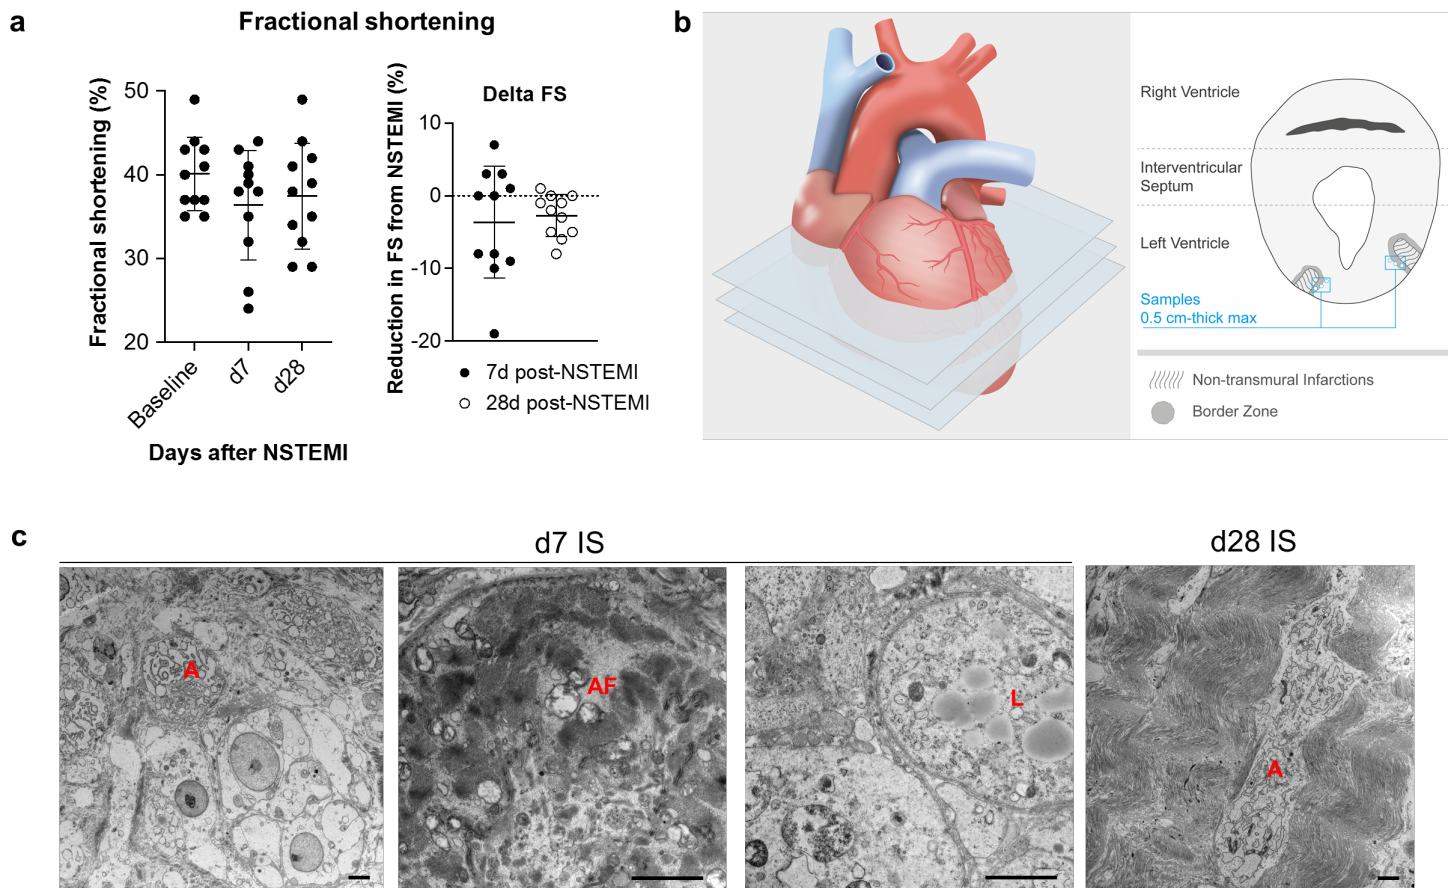

### Supplementary Figure 4 | Functional and histological evaluation of the NSTEMI model

**a**, Left, fractional shortening (FS) percentage at baseline, on d7 and d28 post-NSTEMI. Right, reduction in FS (delta) 7 and 28 days post-surgery.  $n=11$  animals. **b**, Schematics of tissue harvesting from explanted hearts. After perfusion with PBS to remove the excess of blood, each heart was cross-sectioned in slices with a thickness of 1 cm from the atrium to the apex. The whitish colour within samples identified clear infarcted areas. Samples with a maximum size of 0.5 cm in every direction were taken from the ischaemic core, the border and the remote regions. **c**, Representative TEM micrographs on d7 post-NSTEMI (left and centre): Apoptotic bodies (A), autophagosomes (AF) and lipid droplets (L) are widely spread in ischaemic regions previously populated by intact cardiomyocytes. Representative TEM micrographs at 28 days post-NSTEMI (right): Wavy-oriented typical collagen-like deposition replaced cardiomyocytes.  $n=5$  animals per group, scale bar = 2  $\mu\text{m}$ . One-way ANOVA with Tukey's multiple comparisons test in (**a**), and two-tailed Wilcoxon test in (**b**). Data are plotted showing the mean and standard deviation in (**a**). Source data are provided as a Source Data file.

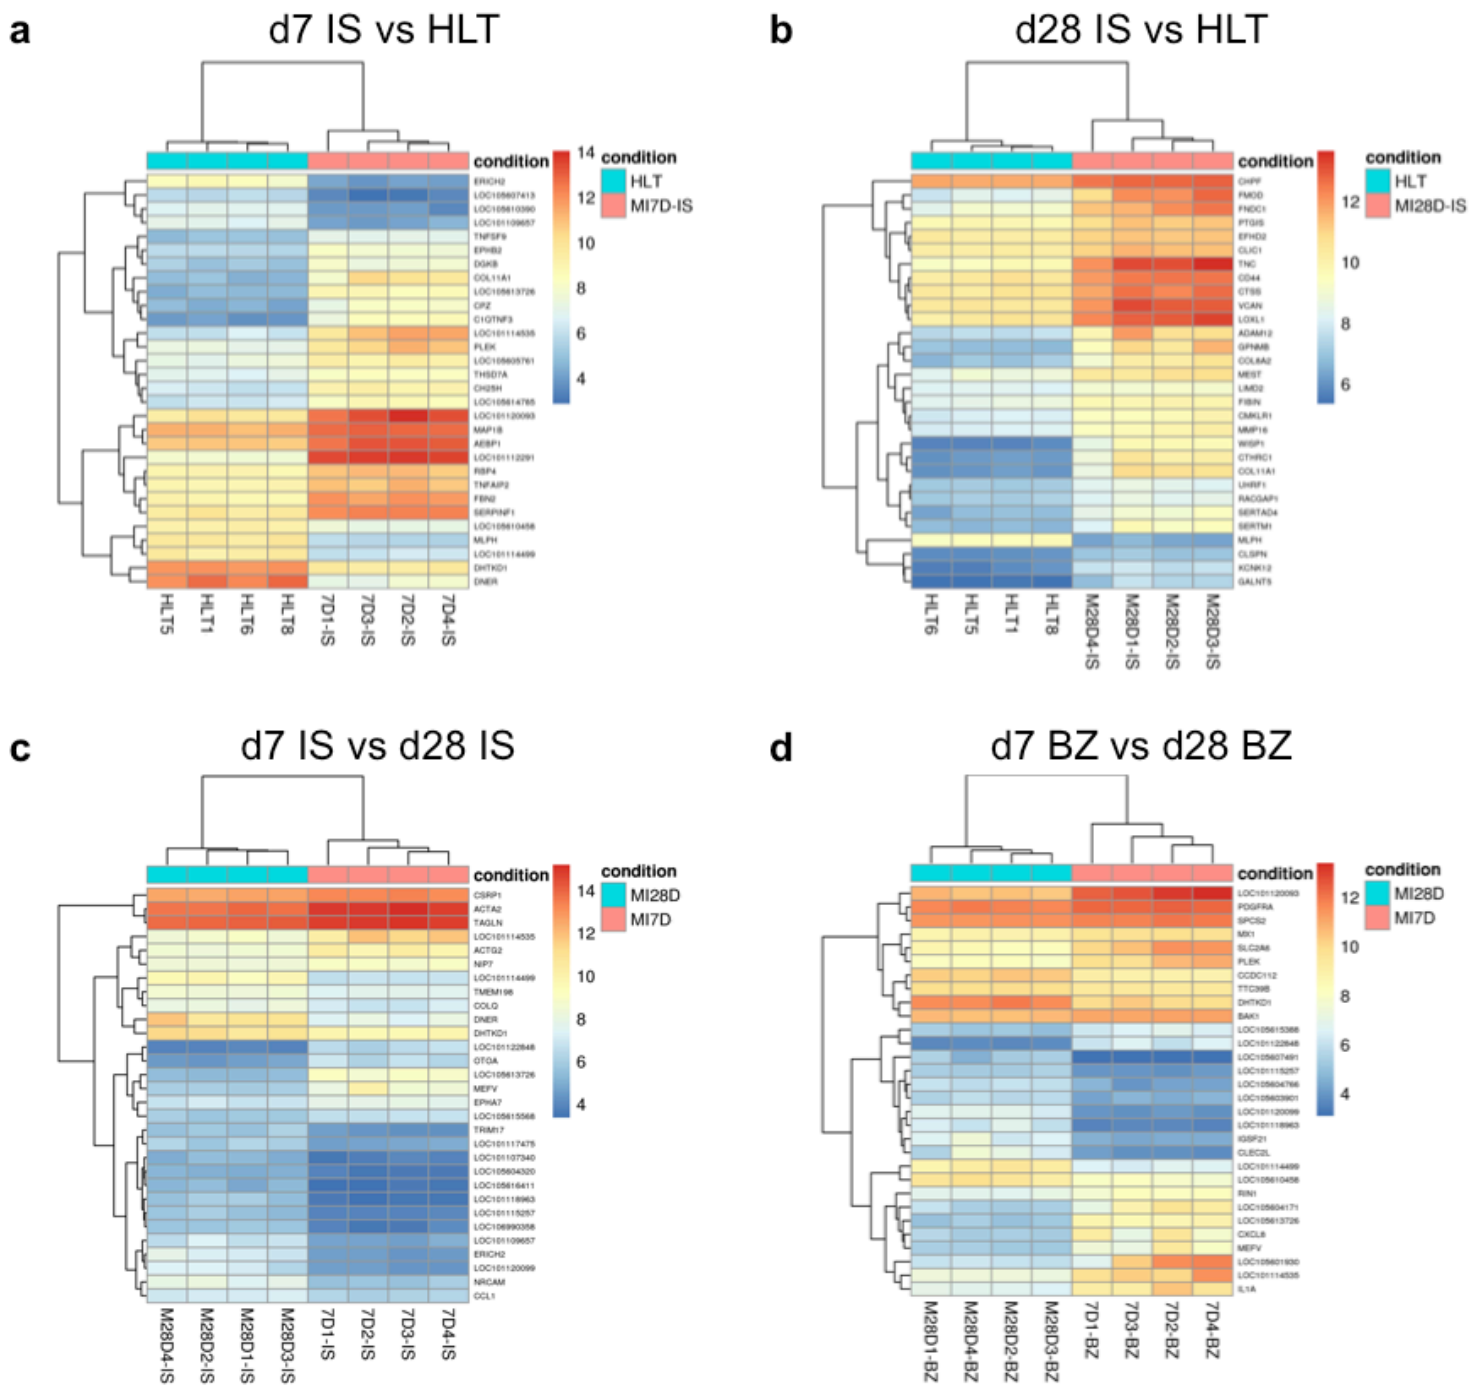

### Supplementary Figure 5 | Transcriptomics in ischaemic core following NSTEMI

**a,b** Bi-clustering heat map listing the top 30 genes that are called differentially expressed (DEG) sorted by lowest  $p$ -values ( $P < 0.05$ ) detected in the ischaemic core on d7 (**a**) and d28 (**b**) post-NSTEMI compared with healthy (HLT) myocardial ventricular tissue from RNA-sequencing data. **c,d** Bi-clustering heat map of DEG between d7 and d28 post-NSTEMI ischaemic core (IS) (**c**) and border zone (BZ) samples (**d**). Difference in mRNA expression between the conditions is indicated as  $\log_2(\text{fold change})$ . Analysis was performed using DESeq2 package and statistical significance assessed by two-sided Wald's test using Benjamini-Hochberg method. Adjusted- $P < 0.05$  was set to identify differences.  $n = 4$  animals per group.





**Supplementary Figure 6 | HIF1 $\alpha$  Causal Network Analysis (IPA<sup>®</sup>) in ischaemic core post-NSTEMI**

**a,b** HIF1 $\alpha$  is a key regulator in NSTEMI on d7 (**a**) and d28 (**b**) post-NSTEMI. Shades of red and green indicate the degree of upregulation and downregulation, respectively. The activation of the downstream node is orange-coded, inhibition is blue-coded. If the findings underlying the relationship are inconsistent with the state of the downstream node yellow is used, and grey if there is no predicted effect. Pointed arrowheads indicate that the downstream node is expected to be activated, while blunt arrowheads indicate it is expected to be inhibited.  $\log_2$ (fold change),  $P$ , and adjusted- $P$  from RNA-sequencing data are indicated below the gene names.  $n=4$  animals per group.

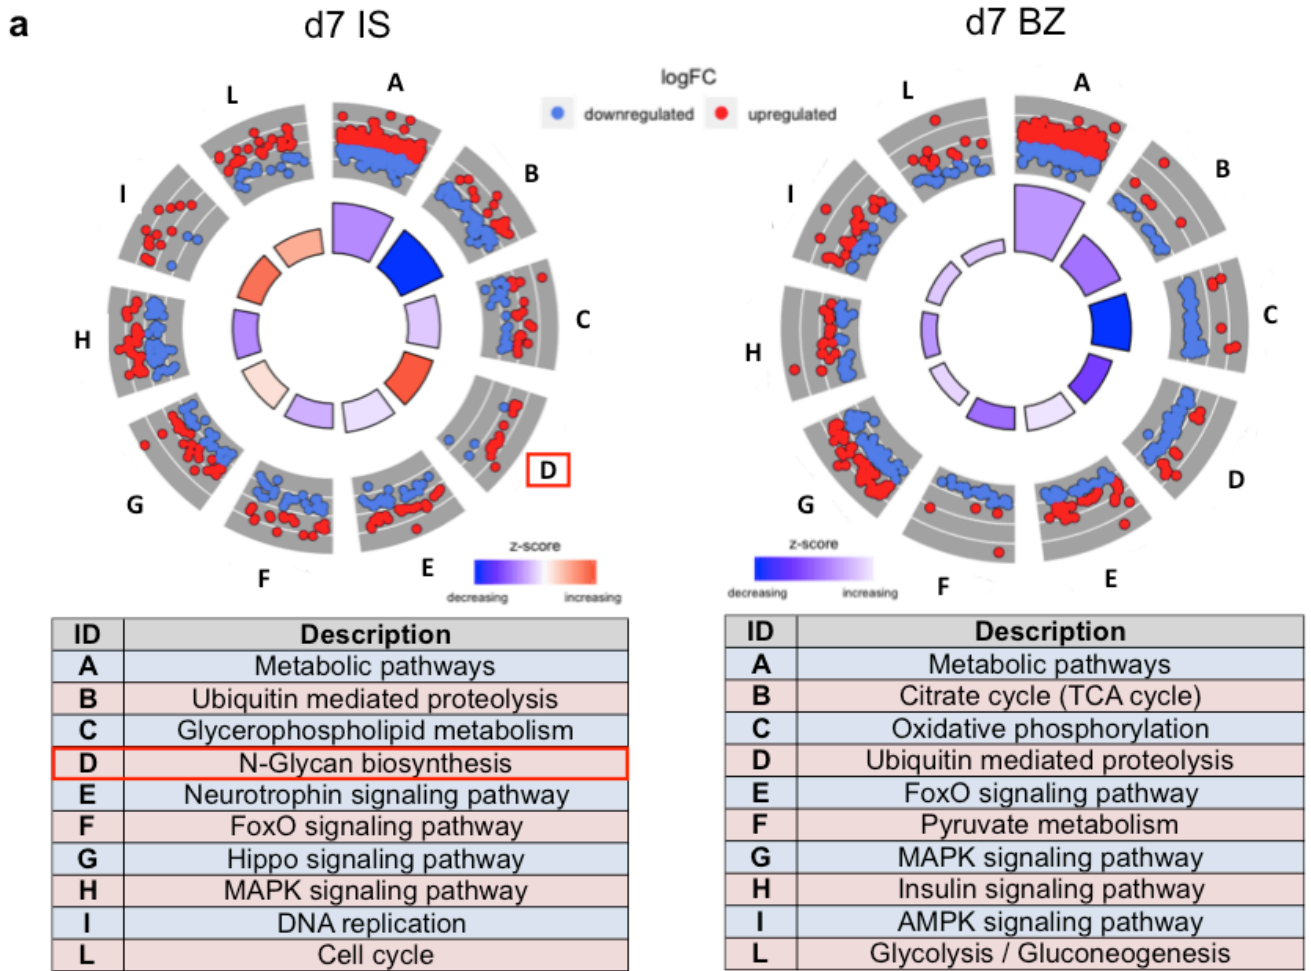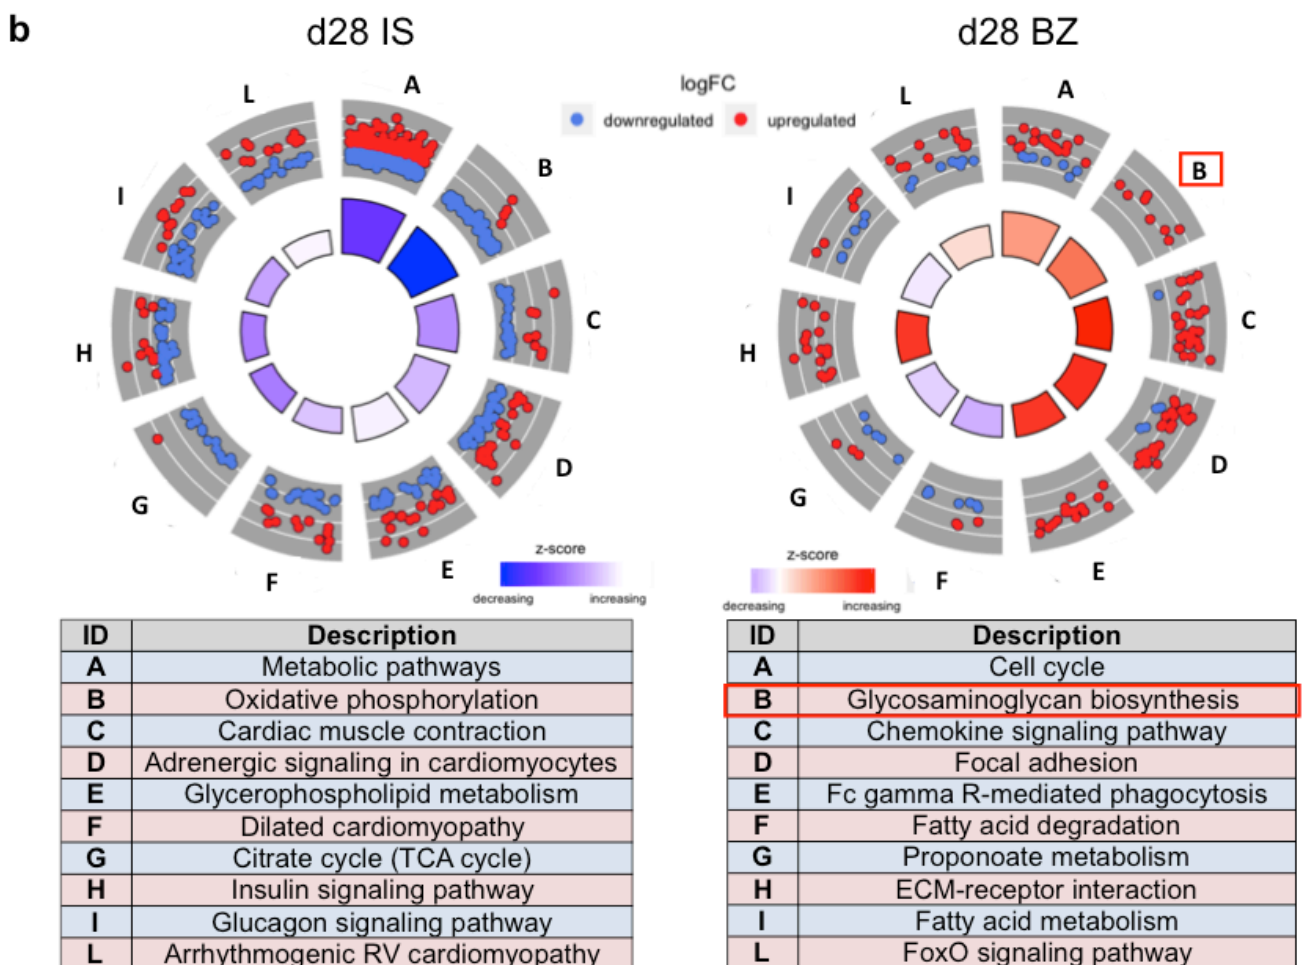

## Supplementary Figure 7 | Functional annotation analysis on transcriptomics

**a,b** Functional annotation analysis using DAVID software of the DEG in ischaemic core and border zone following NSTEMI. Gene-annotation enrichment analysis (KEGG\_PATHWAY) of the set of DEG (adjusted- $P < 0.05$ ) is displayed using the GOCircle plot in which the inner ring is a bar plot where the height of the bar indicates the significance of the term  $-\text{Log}(\text{adjusted-}P)$ , and the colour corresponds to the z-score. Red dots represent up-regulated genes and blue dots indicate down-regulated genes. **a**, N-glycan biosynthesis (framed in red) has one of the highest z-scores in the ischaemic core (IS) on d7 post-surgery. **b**, Glycosaminoglycan biosynthesis (framed in red) is one of the top biological categories showing a highly activated z-score in the border zone (BZ) on d28 post-surgery.  $n=4$  animals per group.

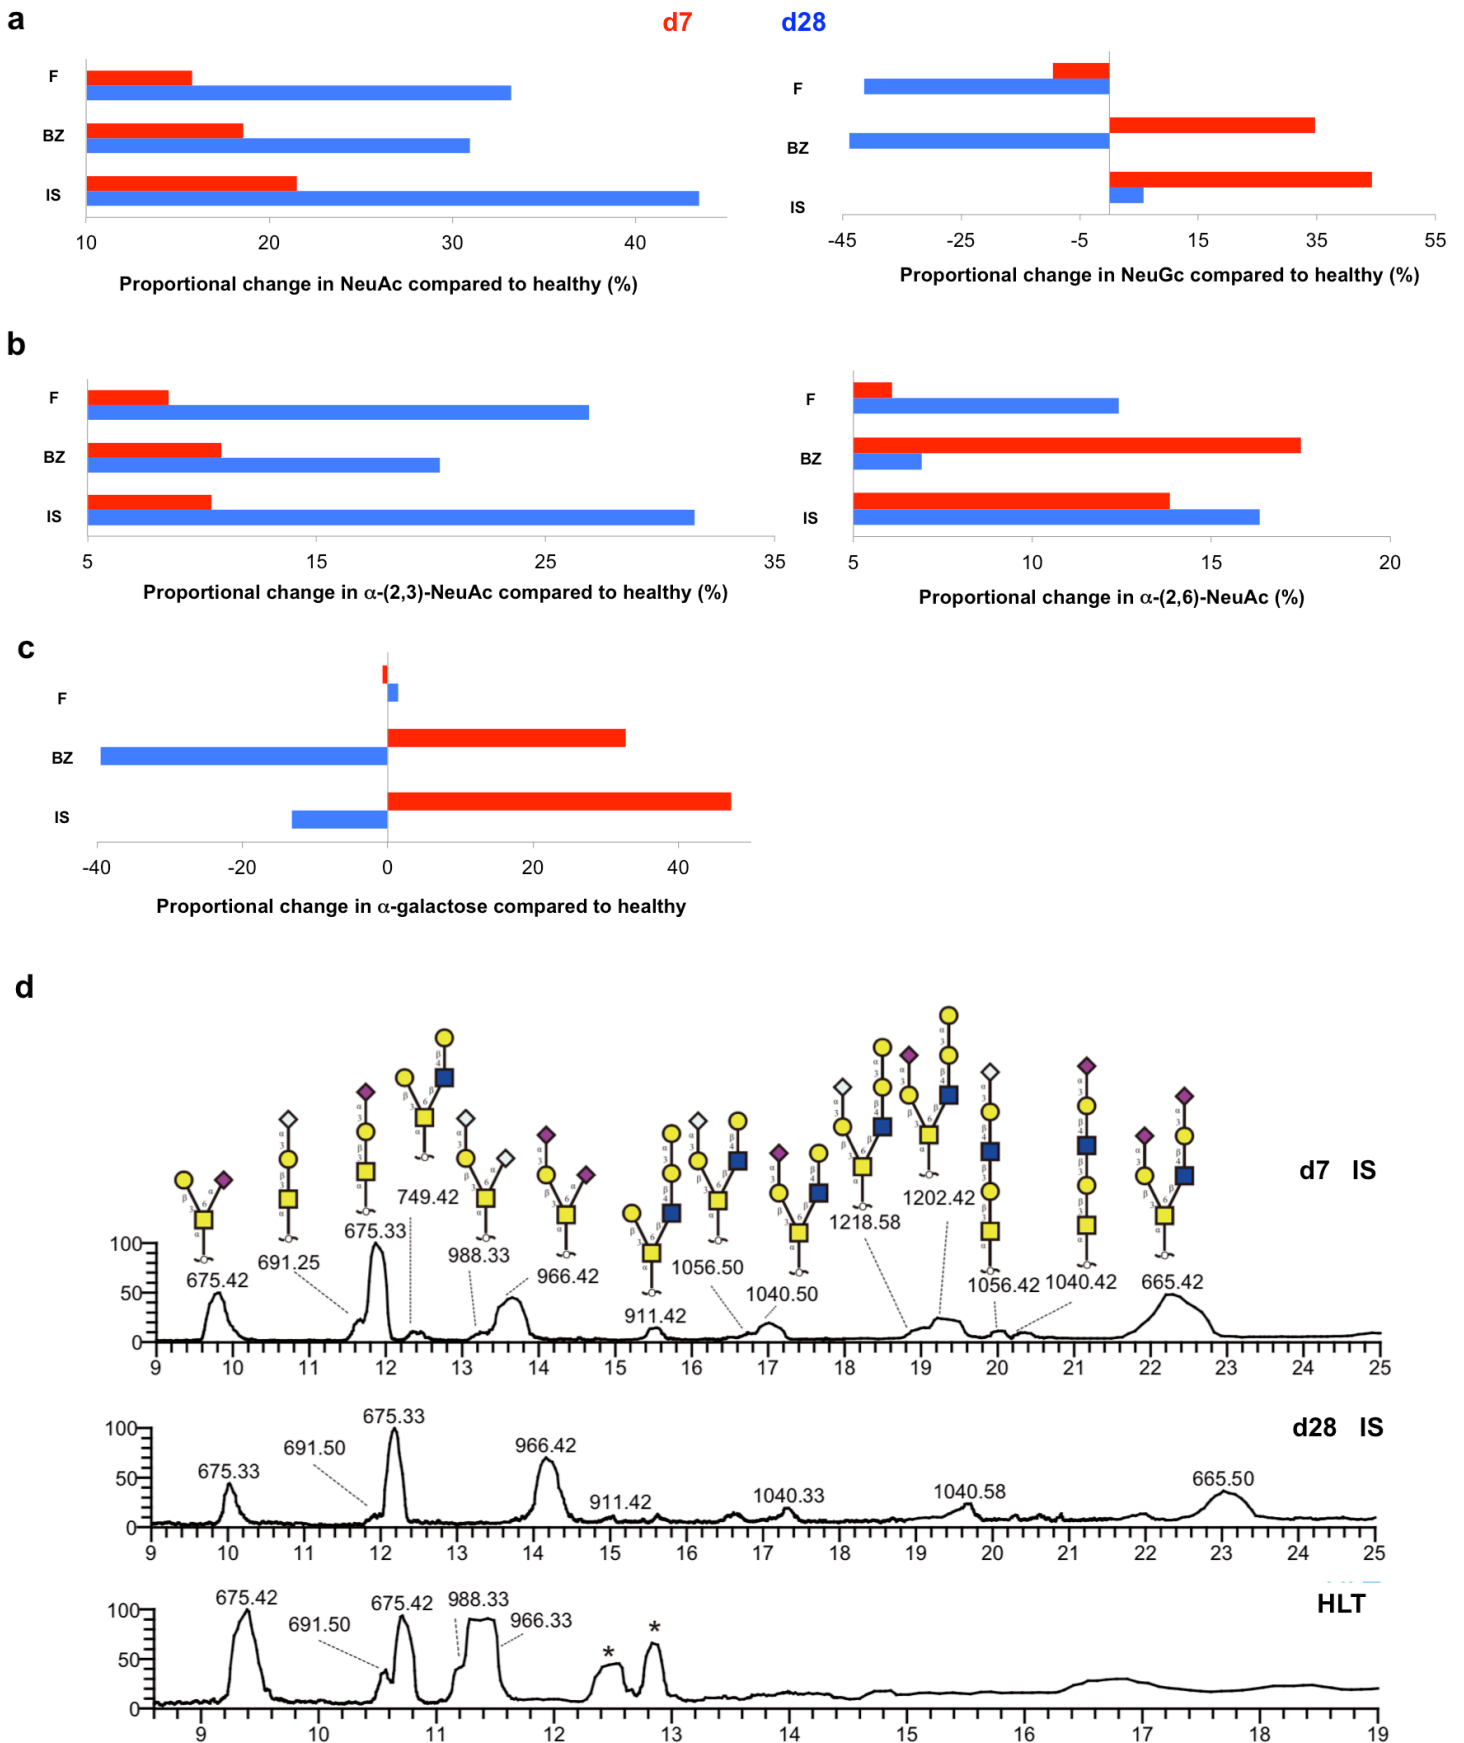

**Supplementary Figure 8 | Glycomics analysis of infarcted hearts following NSTEMI**

Proportional changes in N-linked glycans in the ischaemic core, border and remote regions compared to healthy. **a,b** Amount of N-linked glycans expressing either NeuAc or NeuGc sialic acid (**a**) and  $\alpha$ (2,3)- or

$\alpha(2,6)$ - linkage type **(b)** across the different regions on d7 and d28 post-NSTEMI. **c**, Amount of terminal  $\alpha$ -gal in the infarcted regions. **d**, Extracted ion chromatography (EIC) showing O-linked glycans mainly detected in the cellular membrane protein extracts from the ischaemic core on d7 and d28 post-surgery compared with healthy (HLT) myocardial tissue. Regions of infarcted hearts are labelled as follows: IS = ischaemic core, BZ = border zone, F = remote zone from the infarct. Data are representative of two independent experiments. Each analysed sample was a pool of samples coming from three individuals ( $n=3$  animals per group). Source data are provided as a Source Data file.

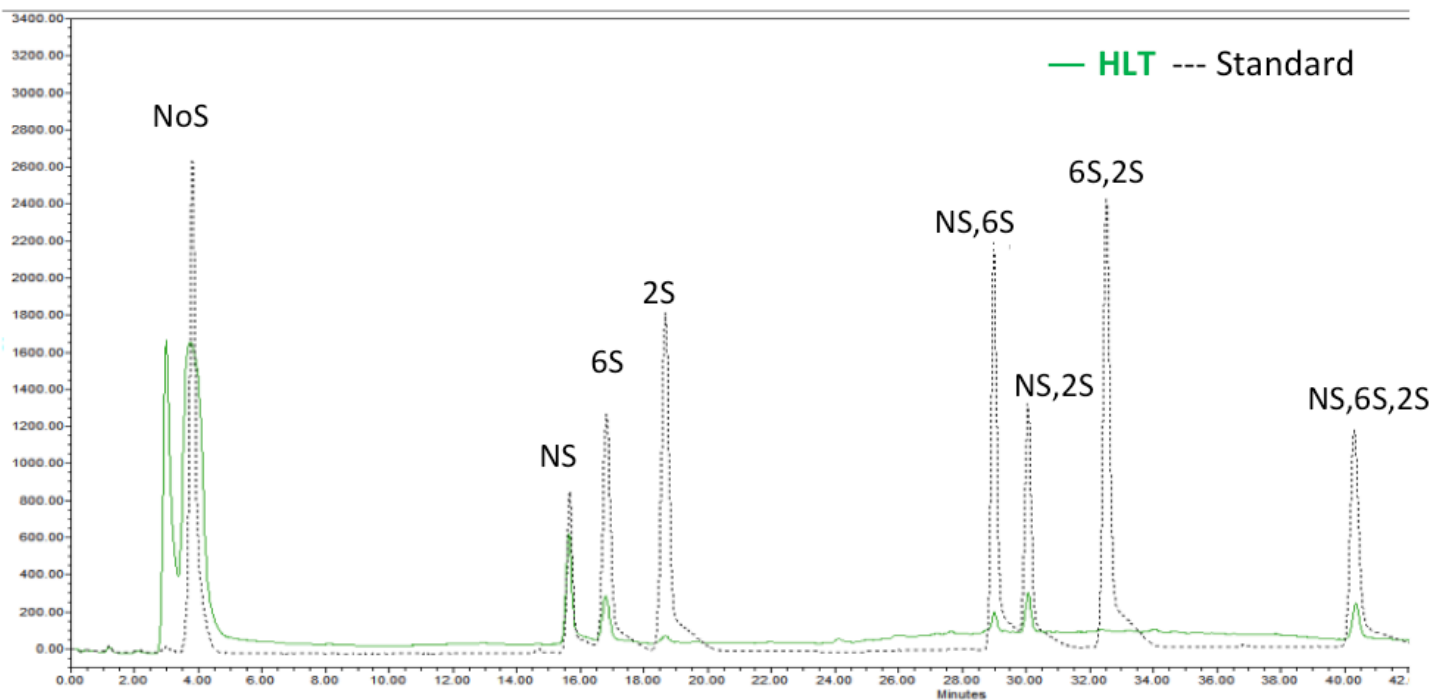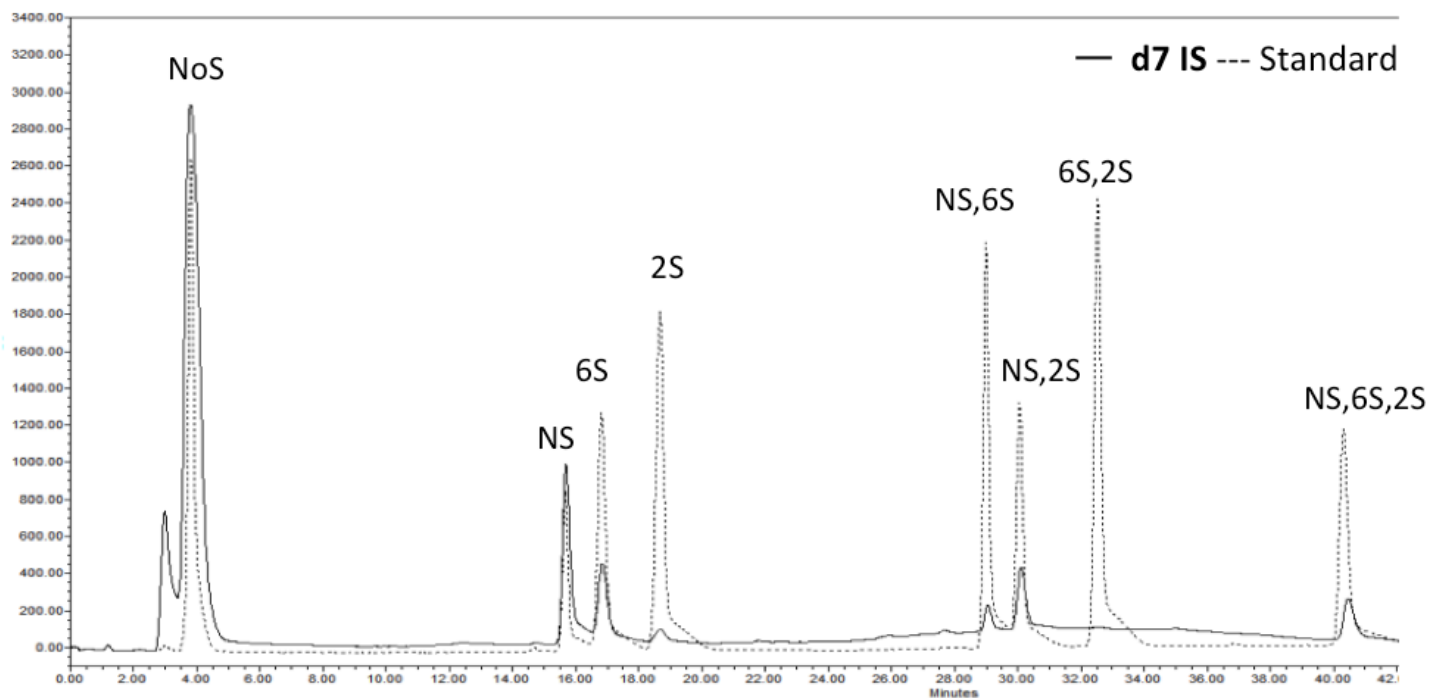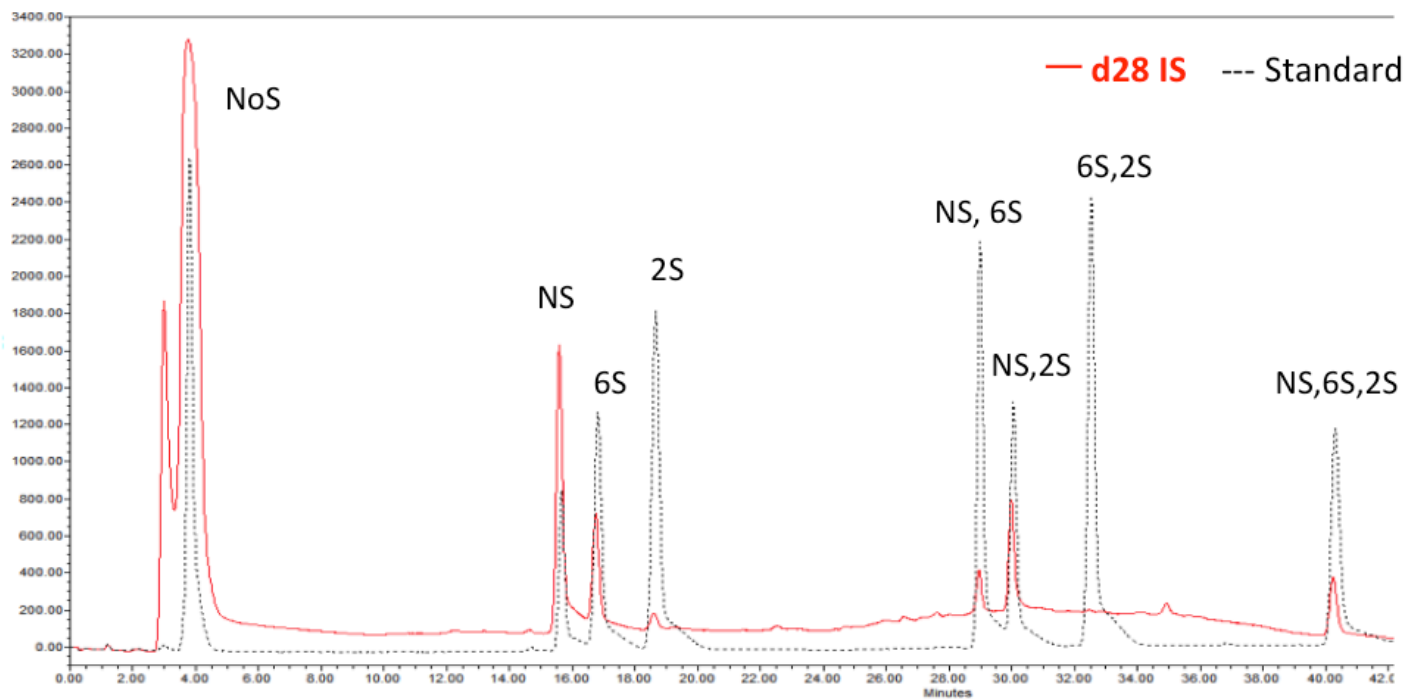

## Supplementary Figure 9 | HS sulfation pattern following NSTEMI

Representative HPLC chromatograms showing the sulfation profile of heparan sulfate (HS) extracted from healthy myocardial tissue (top), and the ischaemic region on d7 (middle) and d28 (bottom) post-NSTEMI. Each profile has been integrated by comparison to an external standard mix (dotted line in grey in all chromatograms) composed of unsulfated disaccharide (NoS), monosulfated disaccharides with a different position of sulfation (NS; 6S; 2S), disulfated disaccharides (NS, 6S; NS,2S; 6S, 2S) and trisulfated disaccharide (NS, 6S, 2S).  $n=5$  HLT,  $n=4$  d7 and  $n=5$  d28 post-NSTEMI.

### Abbreviations

ACN: Acetonitrile

AHA: American Heart Association

AUC: Area Under the Curve

BSA: Bovine Serum Albumin

BZ: Border Zone

CID: Collision-Induced Dissociation

CS: Chondroitin Sulfate

cTn: Cardiac Troponin

DAVID: Database for Annotation, Visualization, and Integrated Discovery

DEG: Differential Expressed Genes

DMMB: Dimethylmethylene Blue

ECG: Electrocardiogram

ECM: Extracellular Matrix

EDD: left ventricular End Diastolic Diameter

EDTA: Ethylenediaminetetraacetic Acid

EF: Ejection Fraction

ESD: left ventricular End Systolic Diameter

F: Remote region

FA: Formic Acid

FBS: Foetal Bovine Serum

FDR: False Discovery Rate

FS: Fractional Shortening

GAGs: Glycosaminoglycans

GO: Gene Ontology

HPLC: High Performance Liquid Chromatography

HS: Heparan Sulfate



IL: Interleukin  
IPA: Ingenuity Pathway Analysis  
IS: Ischaemic core  
KEGG: Kyoto Encyclopedia of Genes and Genomes  
LAD: Left Anterior Descending coronary artery  
MI: Myocardial Infarction  
MMP: Matrix Metalloproteinase  
MWCO: Molecular Weight Cut-Off  
NeuAc: Neuraminic Acid  
NeuGc: N-Glycolylneuraminic Acid  
NSTEMI: Non-ST-segment Elevation Myocardial Infarction  
O/N: Overnight  
PB: Phosphate Buffer  
PBS: Phosphate Buffer Saline  
PFA: Paraformaldehyde  
LC-ESI-MS/MS: Liquid Chromatography-Electrospray Ionization-tandem Mass Spectrometry  
PK: Proteinase K  
RT: Room Temperature  
sGAG: Sulfated Glycosaminoglycan  
SIGLEC: Sialic acid-binding Immunoglobulin-type Lectin  
SMA: Smooth Muscle Actin  
STEMI: ST-segment Elevation Myocardial Infarction  
TBS: Tris-Buffered Saline  
TEAB: Triethylammonium Bicarbonate  
TEM: Transmission Electron Microscopy  
TFA: Trifluoroacetic Acid  
TKO: Triple Knock-out  
TNF: Tumour Necrosis Factor  
TTE: Transthoracic Echocardiography  
UHPLC: Ultra-High Performance Liquid Chromatography  
VEGF: Vascular Endothelial Growth Factor  
WMI: Wall Motion Index  
 $\alpha$ -Gal:  $\alpha$ -Galactose
