# Supplementary material
Source: PubMed Central journal article supplement (PMC9947167)
Supplement: 41467_2023_36350_MOESM3_ESM.pdf [file 41467_2023_36350_MOESM3_ESM.pdf]

# Description of Additional Supplementary Files

Reproducing extracellular matrix adverse remodelling of non-ST myocardial infarction  
in a large animal model

Paolo Contessotto, Renza Spelat *et al.*

## Supplementary Data

### Supplementary Data 1:

Differentially expressed genes (DEG) list of ischemic core region on day 7 (d7) vs day 28 (d28) post-NSTEMI

### Supplementary Data 2:

DEG list of border zone region on d7 vs d28 post-NSTEMI

### Supplementary Data 3:

DEG list of remote zone region on d7 vs d28 post-NSTEMI

### Supplementary Data 4:

DEG list of ischemic core region on d7 post-NSTEMI vs healthy

### Supplementary Data 5:

DEG list of ischemic core region on d28 post-NSTEMI vs healthy

### Supplementary Data 6:

Canonical Pathway Analysis of ischemic core region DEG on d7 and d28 by IPA®

### Supplementary Data 7:

Biological Functions Analysis of ischemic core region DEG on d7 and d28 by IPA®

### Supplementary Data 8:

Molecular targets associated with HIF1 $\alpha$  on d7 ischemic core obtained by IPA® from DEG data

### Supplementary Data 9:

Molecular targets associated with HIF1 $\alpha$  on d28 ischemic core obtained by IPA® from DEG data

### Supplementary Data 10:

Upstream Regulator Analysis of ischemic core on d28 by IPA® from proteomic data

### Supplementary Data 11:

List of proteins detected by nLC-ESI MS/MS label-free proteomic analysis (false-positive identification rate FDR  $\leq$ 1%) in ischemic core (IS), border zone (BZ), remote zone (F) on d7 and d28 post-NSTEMI and healthy (HLT) samples

### Supplementary Data 12:

Gene Ontology Enrichment Analysis of ischemic core region DEG on d7 post-NSTEMI

**Supplementary Data 13:**

Gene Ontology Enrichment Analysis of border zone region DEG on d7 post-NSTEMI

**Supplementary Data 14:**

Gene Ontology Enrichment Analysis of ischemic core region DEG on d28 post-NSTEMI

**Supplementary Data 15:**

Gene Ontology Enrichment Analysis of border zone region DEG on d28 post-NSTEMI

**Supplementary Data 16:**

List of N- and O-glycans detected by LC-ESI MS/MS glycomic analysis in ischemic core (IS), border zone (BZ), remote zone (F) on d7 and d28 post-NSTEMI and healthy (HLT) samples
